# Supplementary material
Source: MDPI journal article supplement (https://www.mdpi.com/2410-3888/7/6/346)
Supplement: s1 [file s1]

## Supplementary Materials: Effects of Short-Term Salinity Stress on Ions, Free Amino Acids, Na<sup>+</sup>/K<sup>+</sup>-ATPase Activity, and Gill Histology in the Threatened Freshwater Shellfish *Solenia oleivora*

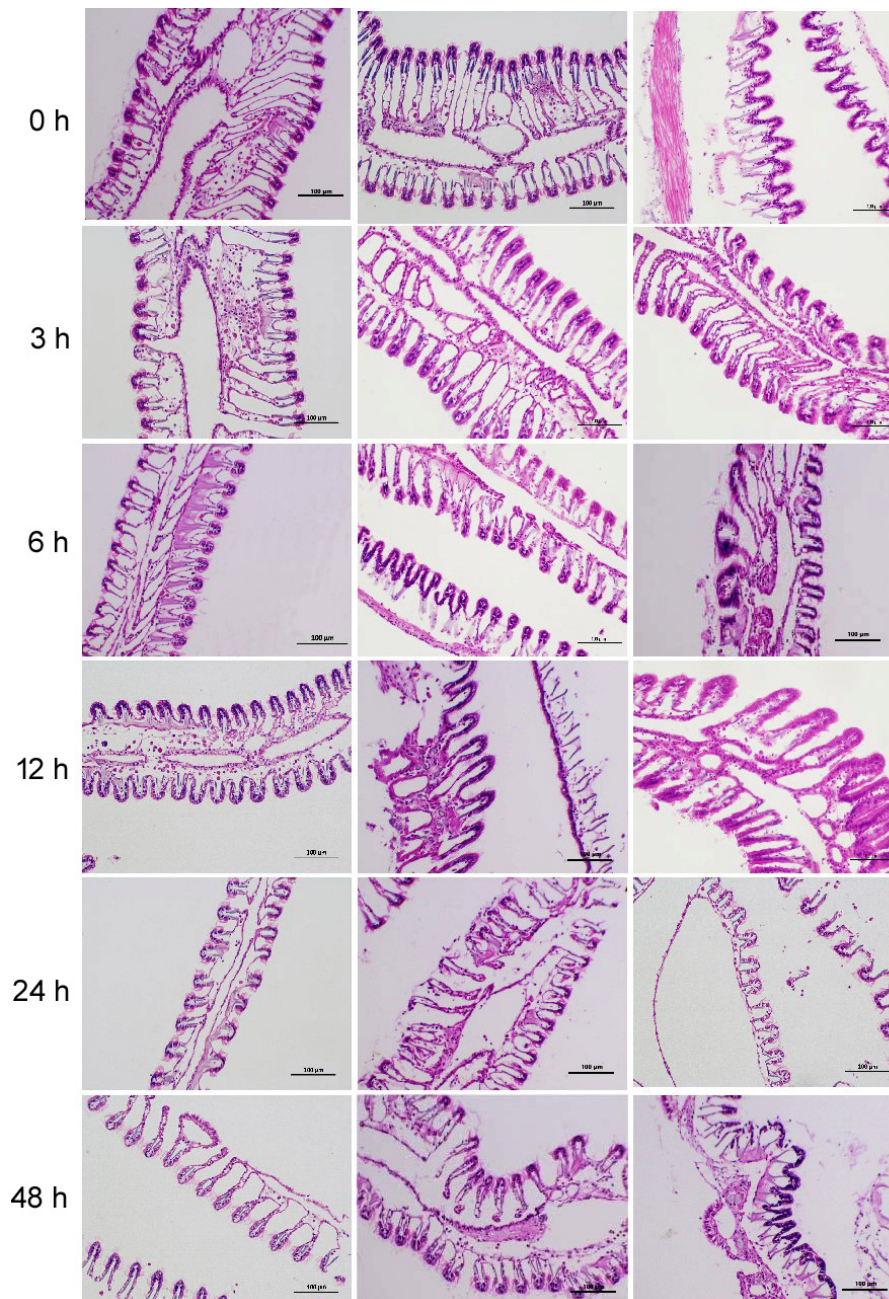

**Figure S1.** Effects of salinity on gill histomorphology. Each image comes from a different individual. Scale bars = 100 μm; magnification: 200×.
